# Supplementary material for: m5C Regulator-Mediated Methylation Modification Patterns and Tumor Microenvironment Infiltration Characterization in Papillary Thyroid Carcinoma
Source: PubMed Central journal article supplement (PMC8597900; doi:10.3389/fonc.2021.729887), 2021-11-03
Supplement: DataSheet_1.pdf [file DataSheet_1.pdf]

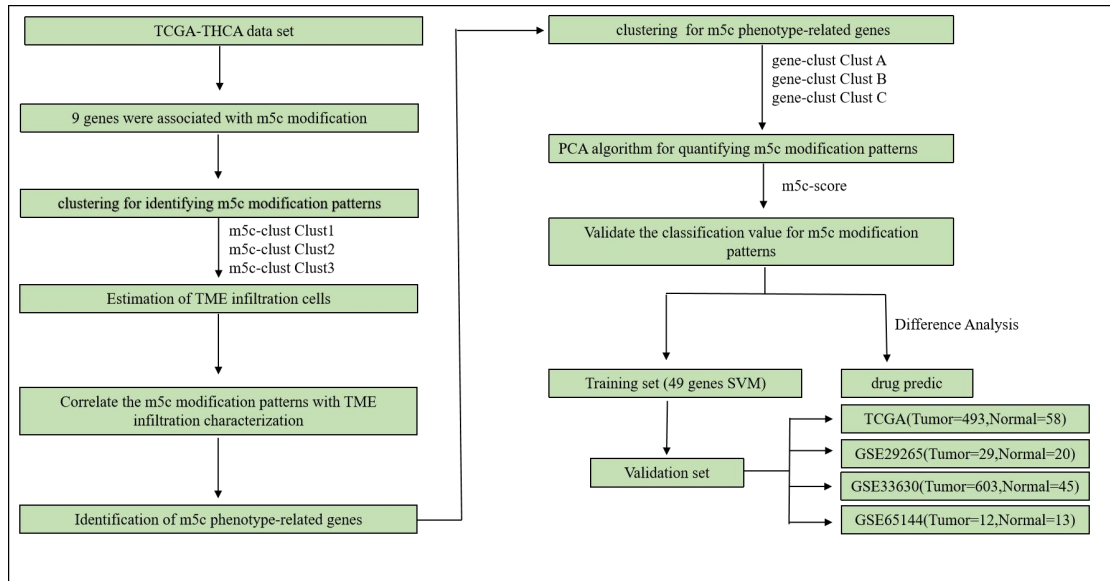

**Supplementary Figure 1. The work flow chart in the present work.**

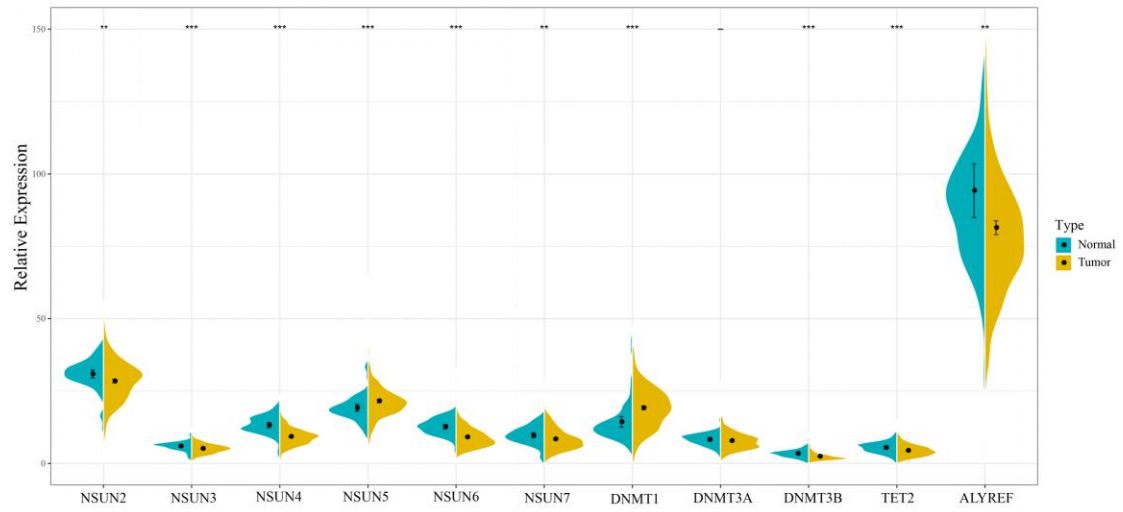

**Supplementary Figure 2. Expression of 11 m<sup>5</sup>C regulators in normal samples and PTC samples in TCGA database.**

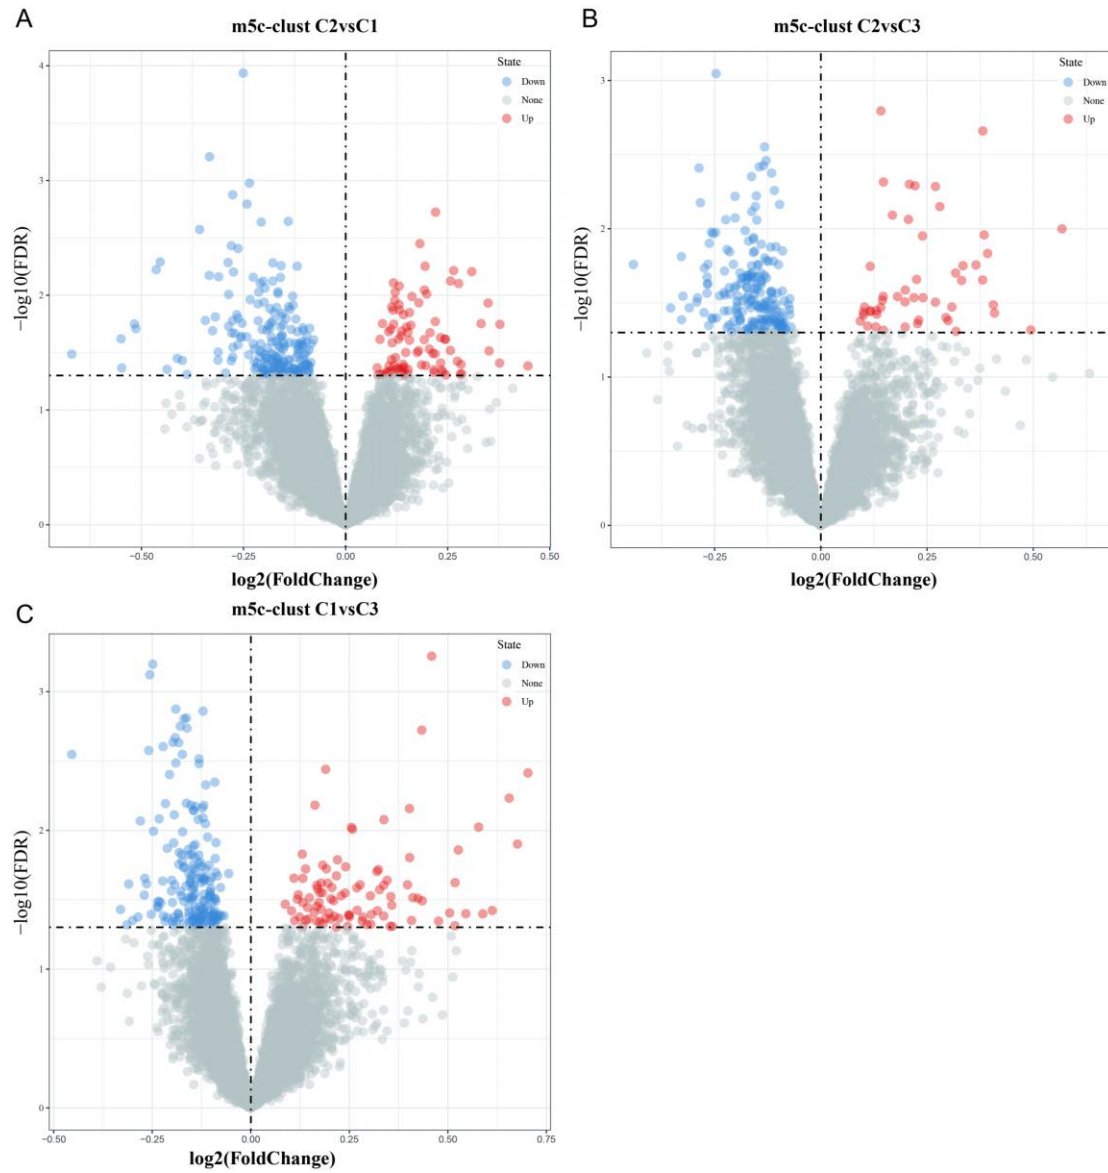

**Supplementary Figure 3. DEGs between different m<sup>5</sup>C modification patterns. (A) DEGs between m<sup>5</sup>C-cluster 1 and m<sup>5</sup>C-cluster 2. (B) DEGs between m<sup>5</sup>C-cluster 2 and m<sup>5</sup>C-cluster 3. (C) DEGs between m<sup>5</sup>C-cluster 1 and m<sup>5</sup>C-cluster 3.**

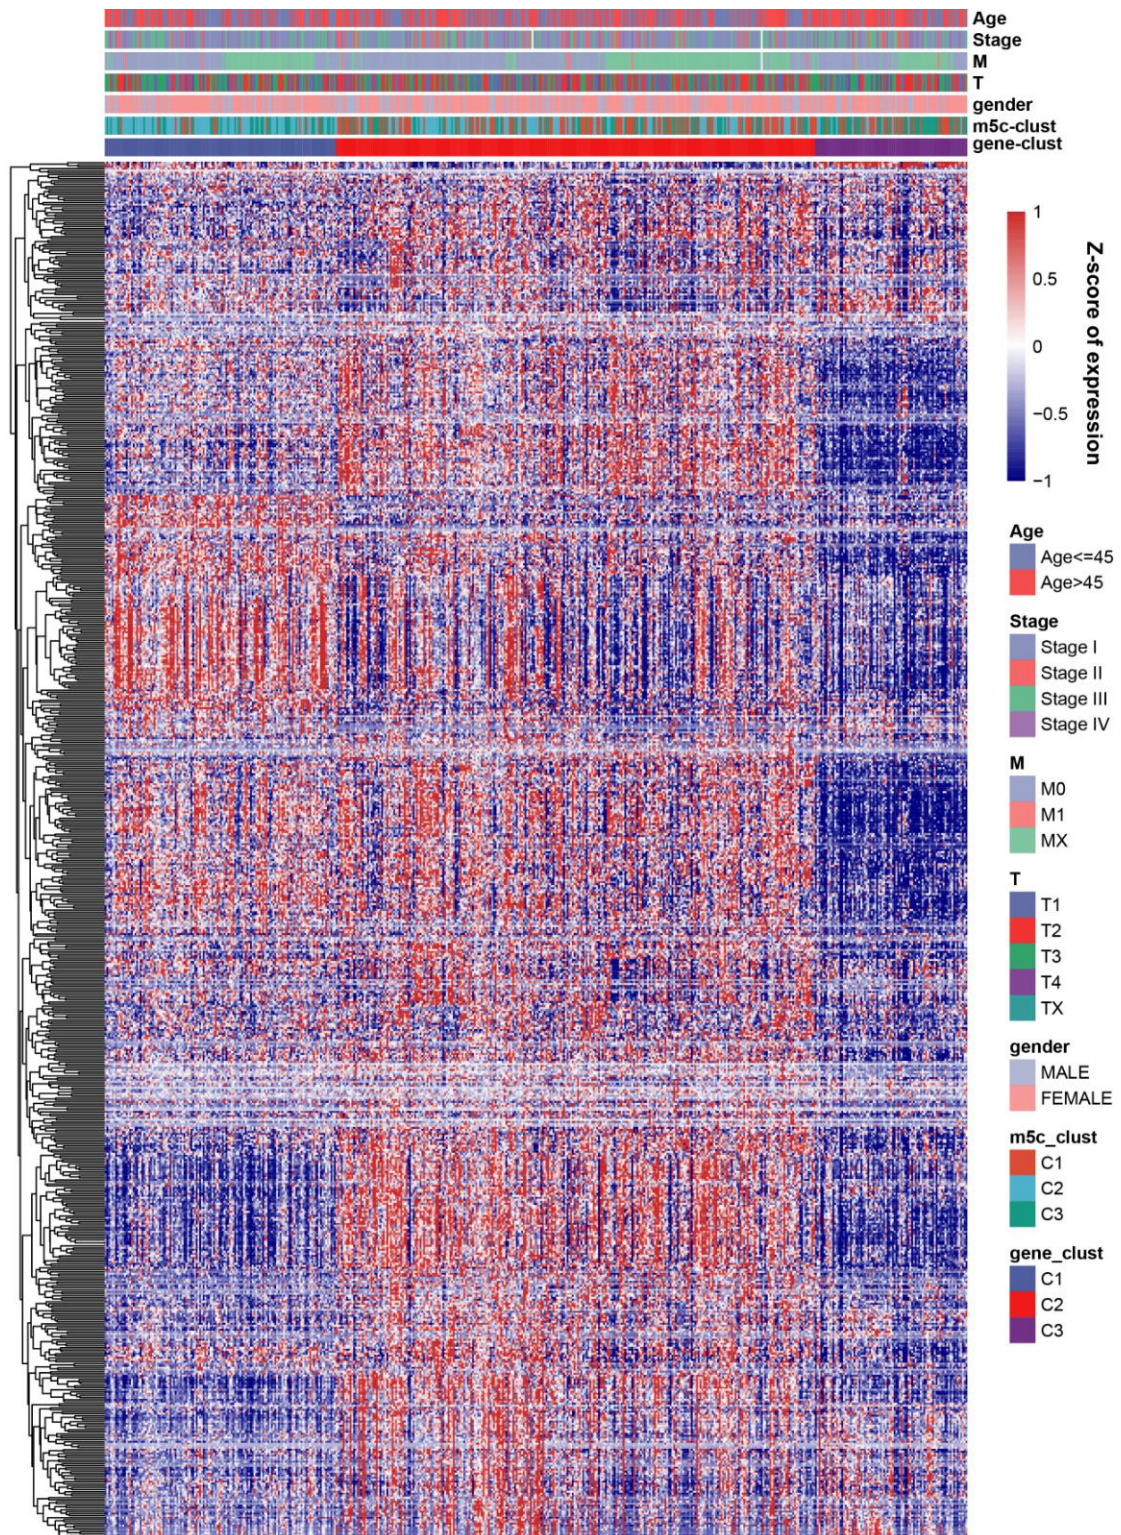

**Supplementary Figure 4. 3 different m<sup>5</sup>C modification genome phenotypes were classified by unsupervised cluster analysis.**

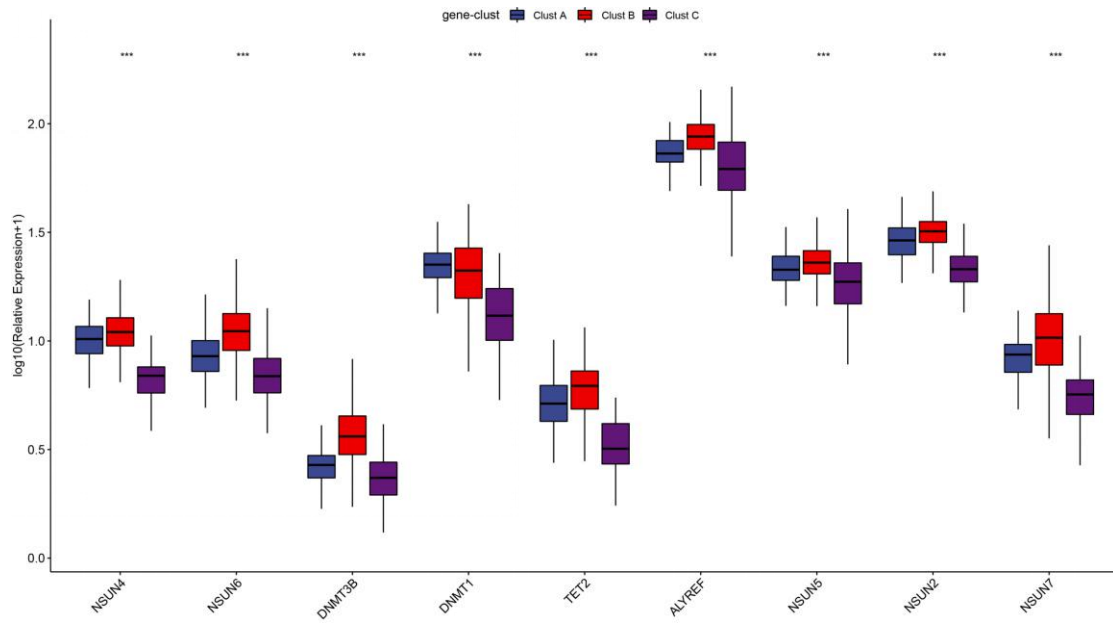

**Supplementary Figure 5. The expression levels of 9 m<sup>5</sup>C regulators in 3 m<sup>5</sup>C gene-cluster subtypes.**

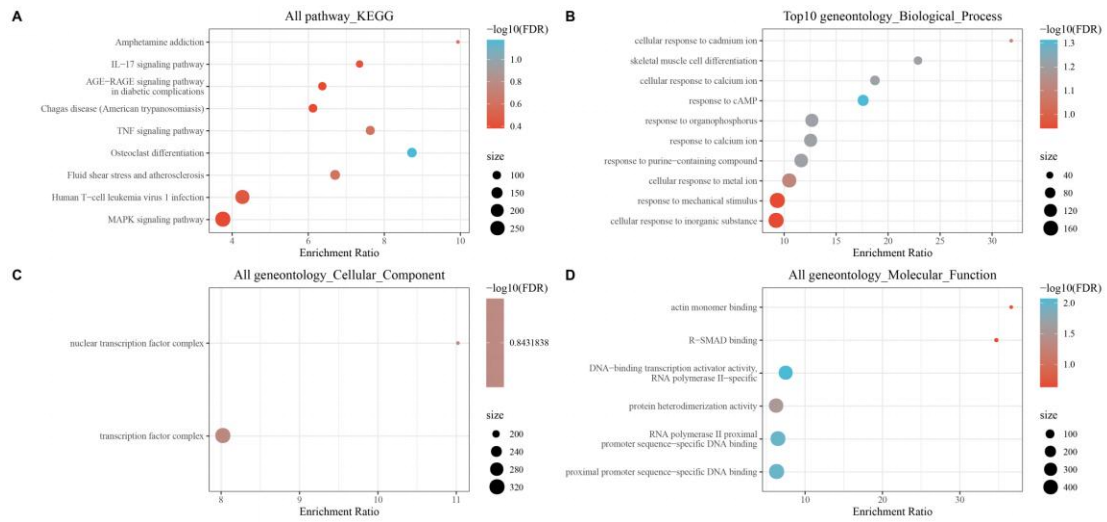

**Supplementary Figure 6. Enrichment analysis of DEGs between high and low m<sup>5</sup>C-score samples.**

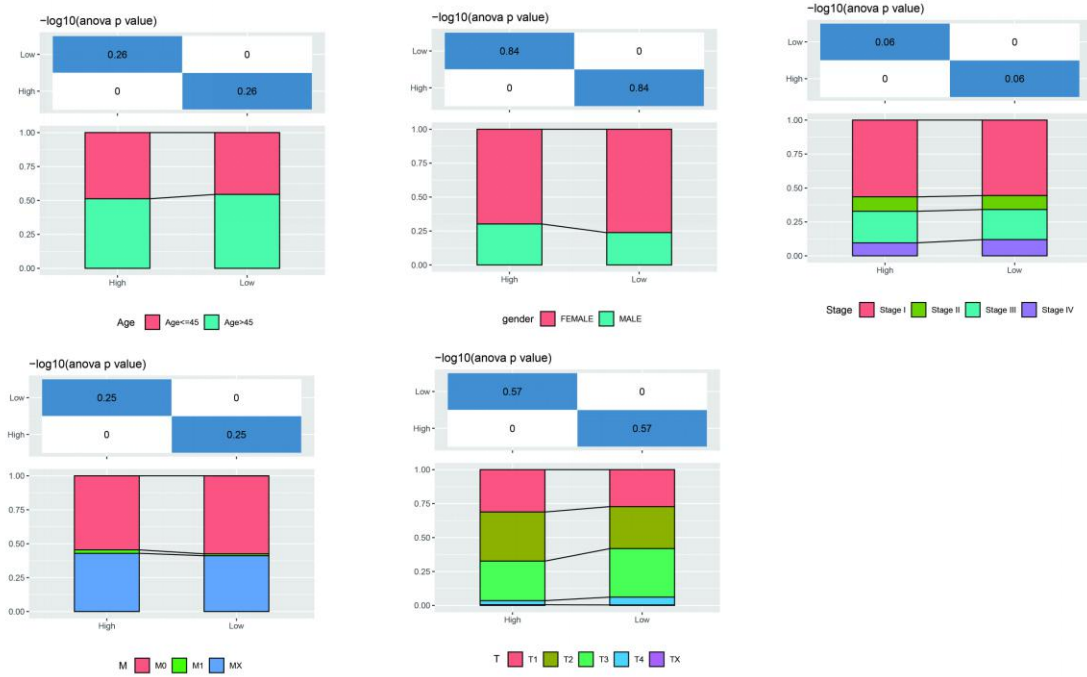

**Supplementary Figure 7. The distribution of clinical features (gender, stage and age) of high and low m<sup>5</sup>C-score samples.**

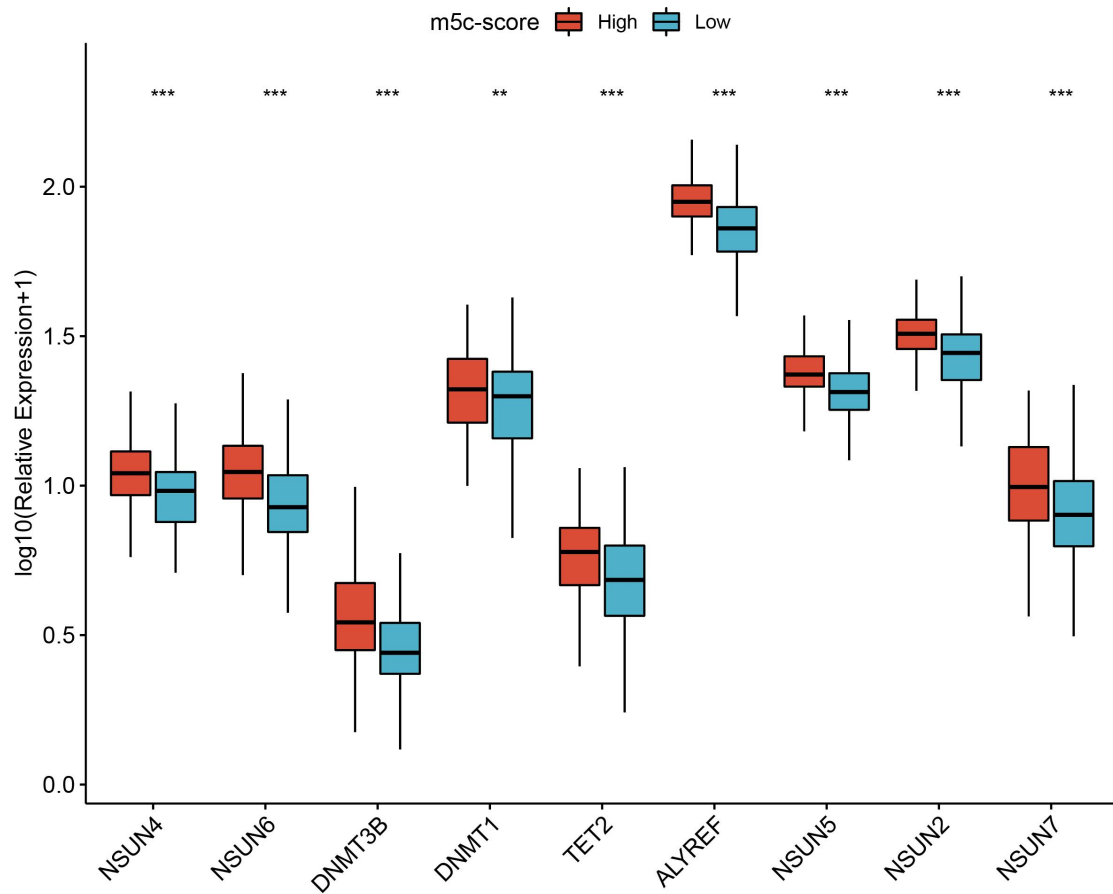

Supplementary Figure 8. Expression of 9 m<sup>5</sup>C regulators in high and low m<sup>5</sup>C-score samples.



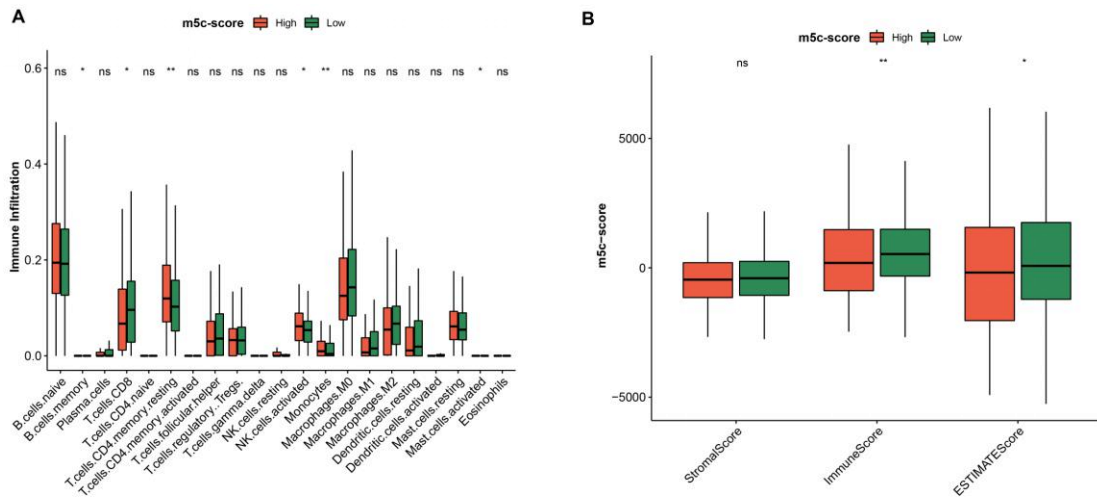

**Supplementary Figure 9 The correlation of m<sup>5</sup>C-score with TME. (A) The levels of infiltration of 21 immune cells in high and low m<sup>5</sup>C-score samples. (B) Levels of stromal scores, immune scores and ESTIMATE scores in high and low m<sup>5</sup>C-score samples.**

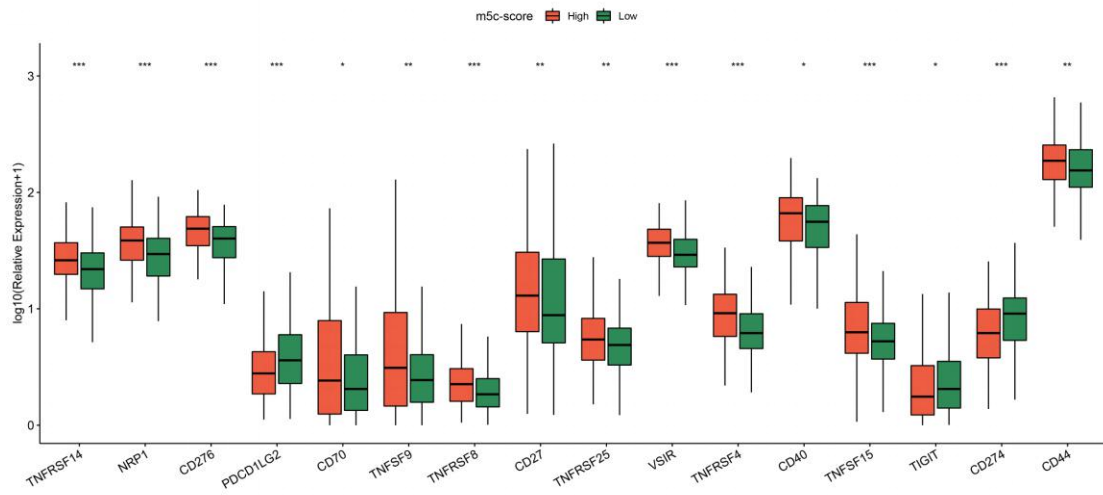

**Supplementary Figure 10. The expression levels of 16 immune checkpoints in high and low m<sup>5</sup>C-score samples.**
