# Supplementary material for: m5C Regulator-Mediated Methylation Modification Patterns and Tumor Microenvironment Infiltration Characterization in Papillary Thyroid Carcinoma
Source: Front Oncol. 2021 Nov 3;11:729887. doi: 10.3389/fonc.2021.729887 (PMC8597900; doi:10.3389/fonc.2021.729887)
Supplement: Supplementary Table 2 — Results of single factor survival analysis for the 49 genes. [file Table_2.xls]

## Sheet: Sheet1
gene	p.value	HR	Low 95%CI	High 95%CI
C19orf48	0.00200506	1.01922	1.00699	1.03161
FRAS1	0.00934102	1.09001	1.02143	1.1632
LINC01534	0.000753484	1.83232	1.28828	2.60609
CEP72	0.000533022	2.1572	1.3962	3.33296
MIR378H	0.00610959	1.50028	1.12263	2.00497
HIST4H4	0.00709539	1.3945	1.09467	1.77645
GATD3B	0.0095222	2.14645	1.20491	3.82371
LOC100506691	0.00255618	1.81094	1.23122	2.6636
TWIST1	0.00423648	1.06163	1.019	1.10605
MDGA1	0.00298111	2.86446	1.4302	5.73702
C10orf82	0.00192967	1.1334	1.04715	1.22676
LENG8-AS1	0.000491561	1.20069	1.08333	1.33075
HHIPL1	0.00651355	2.07411	1.22629	3.5081
IFITM10	0.00113048	1.22795	1.08517	1.38953
RILPL1	0.00186207	1.09018	1.03247	1.15111
VAMP8	0.0045593	0.992617	0.987547	0.997712
EFCAB6	0.000426267	2.87502	1.59773	5.17344
CYP21A1P	0.00979174	1.35674	1.07637	1.71013
SMOC1	2.39616e-05	1.03557	1.01891	1.05251
TTK	0.00609794	1.71562	1.16651	2.52321
HSD17B14	0.0059871	1.00973	1.00278	1.01673
WDR62	0.000143335	2.45382	1.54488	3.89756
NAPSA	0.00729095	1.00523	1.00141	1.00906
SNORA71C	0.000324053	2.22652	1.43919	3.44456
SPART-AS1	0.00216127	1.50388	1.1587	1.9519
RTN4RL2	0.000217307	1.00952	1.00447	1.01461
PTGER1	0.00194687	1.515	1.16488	1.97036
NKILA	1.21868e-06	2.22745	1.61186	3.07814
GUCY2D	0.00611542	1.62129	1.1477	2.2903
TRIP13	3.1217e-05	2.51643	1.62988	3.88519
REM2	6.83639e-06	1.78121	1.38511	2.29057
ENTPD1	0.00912575	0.934892	0.888755	0.983424
C1orf229	0.000577286	2.50095	1.48395	4.21496
LOC100288748	0.00429475	1.3722	1.10434	1.70503
TONSL	0.000516512	1.19932	1.08237	1.32891
PCAT6	9.96558e-05	1.11736	1.05662	1.18158
MEIS1	0.000244214	3.96176	1.8986	8.26688
EME1	0.00110796	5.21591	1.93316	14.0732
PRR7	6.59827e-05	1.14667	1.07212	1.2264
LINGO4	0.000424757	1.41182	1.16542	1.71033
SMIM10L2B	0.000616309	1.15585	1.0639	1.25576
C17orf53	0.00768728	2.47871	1.2716	4.83174
ZNF337-AS1	9.03715e-05	5.03723	2.24214	11.3168
SPAG4	0.0052894	1.06498	1.01889	1.11316
TUB	0.00295182	1.07781	1.02586	1.1324
MEGF8	0.00221068	1.07344	1.02581	1.12328
MSX2	0.000236823	1.70627	1.2833	2.26865
CSF2	0.000375848	1.09172	1.04018	1.14581
RADX	0.000659521	1.54352	1.20235	1.98151
