# Supplementary material for: m5C Regulator-Mediated Methylation Modification Patterns and Tumor Microenvironment Infiltration Characterization in Papillary Thyroid Carcinoma
Source: Front Oncol. 2021 Nov 3;11:729887. doi: 10.3389/fonc.2021.729887 (PMC8597900; doi:10.3389/fonc.2021.729887)
Supplement: Supplementary Table 5 — Potential drugs for PTC screened and analyzed by CMAP tool. [file Table_5.xls]

## Sheet: Sheet1
rank	cmap.name	mean	n	enrichment	p	specificity	percent.non.null
1	anisomycin	0.832	4	0.975	0	0.0155	100
2	trichostatin A	0.317	182	0.555	0	0.1991	52
3	LY-294002	0.298	61	0.357	0	0.2215	55
4	helveticoside	0.497	6	0.773	0.00032	0.0596	66
5	vorinostat	0.39	12	0.572	0.00032	0.3719	58
6	theophylline	-0.667	4	-0.886	0.00038	0	100
7	H-7	-0.519	4	-0.882	0.00048	0.1136	100
8	cephaeline	0.43	5	0.789	0.00092	0.1644	60
9	menadione	0.704	2	0.974	0.00107	0.0311	100
10	metformin	-0.262	10	-0.568	0.00116	0	50
11	digoxigenin	0.468	5	0.779	0.00118	0.0307	60
12	methyldopate	0.554	4	0.823	0.00167	0	100
13	tiaprofenic acid	0.531	4	0.815	0.00223	0	100
14	lanatoside C	0.51	6	0.684	0.0025	0.1422	66
15	gentamicin	0.527	4	0.799	0.00306	0.0063	100
16	lycorine	0.496	5	0.722	0.00378	0.0864	80
17	ouabain	0.584	4	0.79	0.0038	0.0909	75
18	emetine	0.51	4	0.79	0.00388	0.1268	75
19	digitoxigenin	0.507	4	0.78	0.00442	0.0714	75
20	atracurium besilate	-0.495	3	-0.861	0.00543	0	100
21	piretanide	-0.418	4	-0.762	0.00656	0.0222	75
22	thapsigargin	-0.549	3	-0.84	0.00827	0.1226	100
23	altretamine	-0.286	4	-0.745	0.0083	0.0127	50
24	isoxicam	-0.375	5	-0.665	0.00989	0.1216	80
25	scriptaid	0.575	3	0.829	0.0101	0.125	100
26	ondansetron	-0.278	4	-0.73	0.0107	0.0075	50
27	rilmenidine	-0.394	4	-0.72	0.01251	0.0069	75
28	proguanil	-0.46	3	-0.814	0.0126	0	66
29	drofenine	0.414	4	0.716	0.01315	0.0065	75
30	asiaticoside	-0.437	4	-0.709	0.0148	0.0131	75
31	octopamine	-0.29	4	-0.703	0.01593	0.0071	50
32	ajmaline	0.489	3	0.8	0.0163	0.0409	100
33	artemisinin	0.452	3	0.795	0.01753	0.0274	100
34	Prestwick-857	-0.265	4	-0.695	0.0182	0.0382	50
35	levomepromazine	0.399	4	0.692	0.01866	0.1707	75
36	irinotecan	0.44	3	0.782	0.02113	0.2818	66
37	cicloheximide	0.474	4	0.685	0.02117	0.1864	75
38	proscillaridin	0.478	3	0.779	0.02177	0.104	66
39	isradipine	0.469	4	0.675	0.02453	0.0159	75
40	flumequine	-0.258	4	-0.675	0.02493	0.0117	50
41	chloropyrazine	-0.253	4	-0.672	0.0258	0.039	75
42	securinine	-0.441	4	-0.671	0.02616	0.1456	75
43	pyrimethamine	-0.338	5	-0.608	0.02627	0.0667	60
44	gemfibrozil	0.422	5	0.61	0.02687	0.0164	80
45	celecoxib	0.342	5	0.605	0.02896	0.0222	80
46	ethambutol	-0.344	5	-0.589	0.03408	0.0281	60
47	podophyllotoxin	0.423	4	0.65	0.03565	0.3191	75
48	gabapentin	-0.329	4	-0.649	0.03607	0.0389	75
49	iopromide	0.349	4	0.648	0.03654	0.0455	75
50	levocabastine	-0.424	4	-0.648	0.0366	0.0526	75
51	tribenoside	0.211	4	0.647	0.03702	0.0847	50
52	antazoline	-0.258	4	-0.645	0.03776	0.0503	50
53	clidinium bromide	0.392	4	0.64	0.0411	0.0201	75
54	R-atenolol	0.298	4	0.637	0.04227	0	75
55	tiabendazole	-0.312	4	-0.634	0.04368	0.0971	50
